# Supplementary material for: First Principles Study of the Structure–Performance Relation of Pristine Wn+1Cn and Oxygen-Functionalized Wn+1CnO2 MXenes as Cathode Catalysts for Li-O2 Batteries
Source: MDPI journal article supplement (doi:10.3390/nano14080666), 2024-04-11
Supplement: s1 [file s1]

## Supporting Information

### **First-Principles Study of the Structure-Performance Relation of Pristine $W_{n+1}C_n$ and Oxygen-Functionalized $W_{n+1}C_nO_2$ MXenes as Cathode Catalysts for Li-O<sub>2</sub> Batteries**

Liwei Zhu, Jiajun Wang, Jie Liu, Ruxin Wang, Meixin Lin, Tao Wang, Yuchao Zhen, Jing Xu\*, Lianming Zhao\*

School of Materials Science and Engineering, China University of Petroleum (East China), Qingdao, Shandong 266580, PR China

\* Corresponding authors.

E-mail addresses: lmzhao@upc.edu.cn (L. Zhao), xujing@upc.edu.cn (J. Xu).

## Table of contents

|                                                                                                                                                                                                         |     |
|---------------------------------------------------------------------------------------------------------------------------------------------------------------------------------------------------------|-----|
| 1. The adsorption configuration of $\text{LiO}_2$ on $\text{W}_{n+1}\text{C}_n$ and $\text{W}_{n+1}\text{C}_n\text{O}_2$ MXenes .....                                                                   | S-3 |
| 2. The adsorption configuration of $\text{Li}_2\text{O}_2$ on $\text{W}_{n+1}\text{C}_n$ and $\text{W}_{n+1}\text{C}_n\text{O}_2$ MXenes.....                                                           | S-4 |
| 3. Formation energy of $\text{W}_2\text{C}$ , $\text{W}_3\text{C}_2$ , and $\text{W}_4\text{C}_3$ .....                                                                                                 | S-5 |
| 4. The adsorption energy of $\text{Li}_x\text{O}_2$ on $\text{W}_{n+1}\text{C}_n$ and $\text{W}_{n+1}\text{C}_n\text{O}_2$ .....                                                                        | S-6 |
| 5. The average length of the Li–O and O–O bonds in $\text{LiO}_2/\text{Li}_2\text{O}_2$ and the adsorbed distance of $\text{LiO}_2/\text{Li}_2\text{O}_2$ on $\text{W}_{n+1}\text{C}_n$ .....           | S-7 |
| 6. The average length of the Li–O and O–O bonds in $\text{LiO}_2/\text{Li}_2\text{O}_2$ and the adsorbed distance of $\text{LiO}_2/\text{Li}_2\text{O}_2$ on $\text{W}_{n+1}\text{C}_n\text{O}_2$ ..... | S-8 |
| 7. $U_{\text{Dc}}$ , $U_0$ , $U_{\text{C}}$ , $\eta_{\text{ORR}}$ , $\eta_{\text{OER}}$ , and $\eta_{\text{TOT}}$ for $\text{W}_{n+1}\text{C}_n$ and $\text{W}_{n+1}\text{C}_n\text{O}_2$ .....         | S-9 |

**Fig. S1.** The top and side views of the adsorption configuration of  $\text{LiO}_2$  on (a1)  $\text{W}_2\text{C}$ , (a2)  $\text{W}_3\text{C}_2$ , (a3)  $\text{W}_4\text{C}_3$ , (b1)  $\text{W}_2\text{CO}_2$ , (b2)  $\text{W}_3\text{C}_2\text{O}_2$ , and (b3)  $\text{W}_4\text{C}_3\text{O}_2$  MXenes.

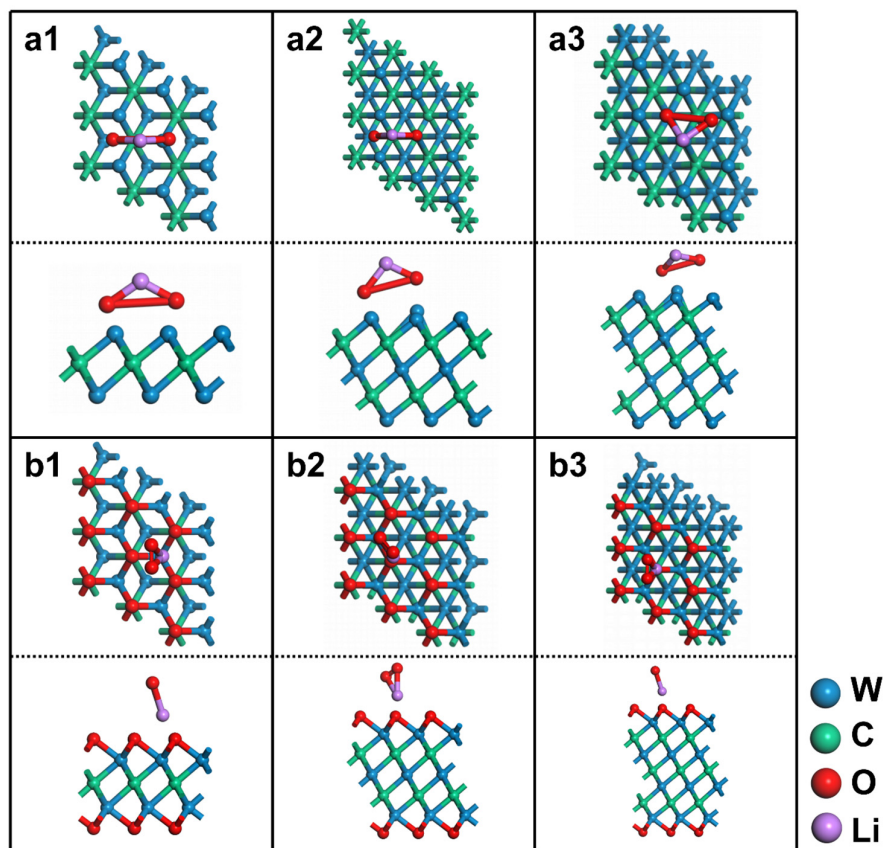

**Fig. S2.** The top and side views of the adsorption configuration of  $\text{Li}_2\text{O}_2$  on (a1)  $\text{W}_2\text{C}$ , (a2)  $\text{W}_3\text{C}_2$ , (a3)  $\text{W}_4\text{C}_3$ , (b1)  $\text{W}_2\text{CO}_2$ , (b2)  $\text{W}_3\text{C}_2\text{O}_2$ , and (b3)  $\text{W}_4\text{C}_3\text{O}_2$  MXenes.

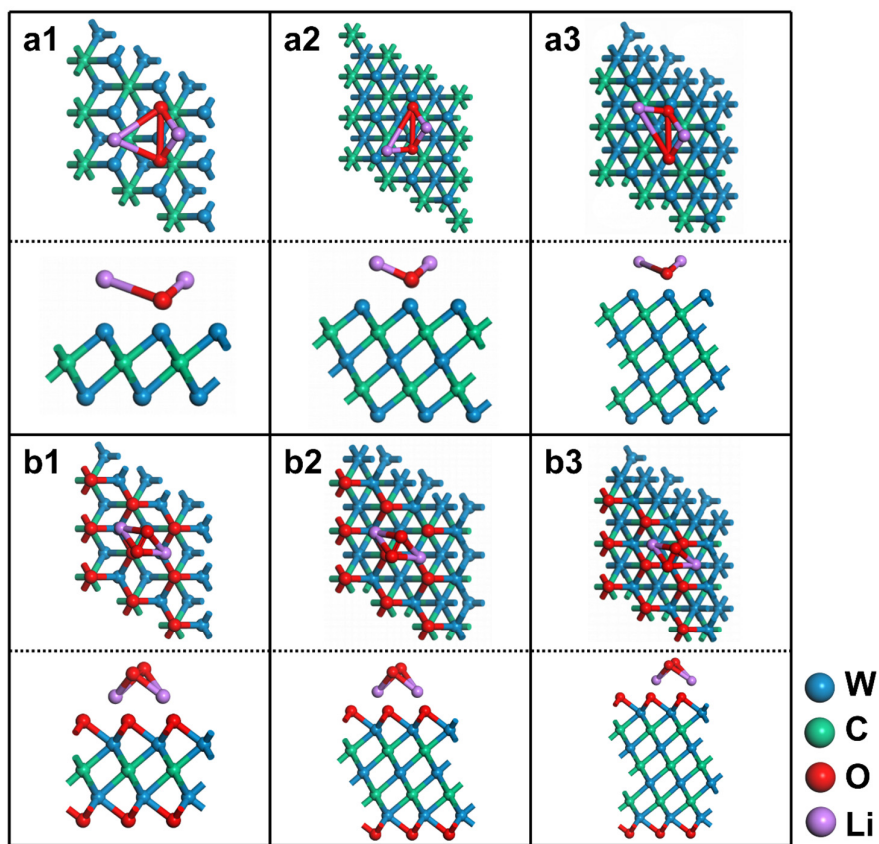

**Table S1.** Formation energy  $E_f$  (in eV) of  $W_2C$ ,  $W_3C_2$ , and  $W_4C_3$ .

| Materials | $E_f/\text{eV}$ |
|-----------|-----------------|
| $W_2C$    | -3.48           |
| $W_3C_2$  | -3.35           |
| $W_4C_3$  | -3.33           |

**Table S2.** The adsorption energy  $E_{\text{ads}}$  (in eV) of  $\text{Li}_x\text{O}_2$  ( $x = 1, 2$ , and  $4$ ) on  $\text{W}_{n+1}\text{C}_n$  and  $\text{W}_{n+1}\text{C}_n\text{O}_2$ .

| Materials                        | $E_{\text{ads}}(\text{O}_2)$ | $E_{\text{ads}}(\text{LiO}_2)$ | $E_{\text{ads}}(\text{Li}_2\text{O}_2)$ | $E_{\text{ads}}((\text{Li}_2\text{O})_2)$ |
|----------------------------------|------------------------------|--------------------------------|-----------------------------------------|-------------------------------------------|
| $\text{W}_2\text{C}$             | −6.36                        | −15.52                         | −23.28                                  | −36.05                                    |
| $\text{W}_3\text{C}_2$           | −5.98                        | −13.73                         | −20.84                                  | −33.33                                    |
| $\text{W}_4\text{C}_3$           | −5.77                        | −12.96                         | −19.63                                  | −31.44                                    |
| $\text{W}_2\text{CO}_2$          | −4.98                        | −11.84                         | −18.59                                  | −30.27                                    |
| $\text{W}_3\text{C}_2\text{O}_2$ | −4.74                        | −11.27                         | −17.70                                  | −29.06                                    |
| $\text{W}_4\text{C}_3\text{O}_2$ | −4.43                        | −10.61                         | −16.51                                  | −27.62                                    |

**Table S3.** The average length (in Å) of the Li–O ( $d_{\text{Li-O}}$ ) and O–O bonds ( $d_{\text{O-O}}$ ) in LiO<sub>2</sub>/Li<sub>2</sub>O<sub>2</sub> and the adsorbed distance of LiO<sub>2</sub>/Li<sub>2</sub>O<sub>2</sub> on W<sub>n+1</sub>C<sub>n</sub> ( $d_{\text{Li-sub}}/d_{\text{O-sub}}$ ).

| LiO <sub>2</sub>    |       |                  |                               |                               | Li <sub>2</sub> O <sub>2</sub> |                  |                               |                               |
|---------------------|-------|------------------|-------------------------------|-------------------------------|--------------------------------|------------------|-------------------------------|-------------------------------|
| Distance            | Free  | W <sub>2</sub> C | W <sub>3</sub> C <sub>2</sub> | W <sub>4</sub> C <sub>3</sub> | Free                           | W <sub>2</sub> C | W <sub>3</sub> C <sub>2</sub> | W <sub>4</sub> C <sub>3</sub> |
| $d_{\text{O-O}}$    | 1.372 | 3.153            | 3.233                         | 2.703                         | 1.597                          | 2.849            | 2.876                         | 2.911                         |
| $d_{\text{Li-O}}$   | 1.774 | 1.845            | 2.006                         | 1.946                         | 1.718                          | 2.491            | 2.344                         | 2.396                         |
| $d_{\text{Li-sub}}$ | \     | 2.512            | 2.582                         | 2.461                         | \                              | 2.244            | 2.204                         | 2.220                         |
| $d_{\text{O-sub}}$  | \     | 1.628            | 1.416                         | 1.581                         | \                              | 1.357            | 1.338                         | 1.409                         |

**Table S4.** The average length (in Å) of the Li–O ( $d_{\text{Li-O}}$ ) and O–O bonds ( $d_{\text{O-O}}$ ) in  $\text{LiO}_2/\text{Li}_2\text{O}_2$  and the adsorbed distance of  $\text{LiO}_2/\text{Li}_2\text{O}_2$  on  $\text{W}_{n+1}\text{C}_n\text{O}_2$  ( $d_{\text{Li-sub}}/d_{\text{O-sub}}$ ).

| LiO <sub>2</sub>    |           |                   |                                 |                                 | Li <sub>2</sub> O <sub>2</sub> |                   |                                 |                                 |
|---------------------|-----------|-------------------|---------------------------------|---------------------------------|--------------------------------|-------------------|---------------------------------|---------------------------------|
| Distance            | Free      | W <sub>2</sub> CO | W <sub>3</sub> C <sub>2</sub> O | W <sub>4</sub> C <sub>3</sub> O | Free                           | W <sub>2</sub> CO | W <sub>3</sub> C <sub>2</sub> O | W <sub>4</sub> C <sub>3</sub> O |
| e                   |           | 2                 | 2                               | 2                               |                                | 2                 | 2                               | 2                               |
| $d_{\text{O-O}}$    | 1.37<br>2 | 1.274             | 1.286                           | 1.304                           | 1.59<br>7                      | 1.336             | 1.312                           | 1.303                           |
| $d_{\text{Li-O}}$   | 1.77<br>4 | 2.126             | 2.053                           | 1.977                           | 1.71<br>8                      | 2.112             | 2.172                           | 2.203                           |
| $d_{\text{Li-sub}}$ | \         | 1.435             | 1.446                           | 1.499                           | \                              | 1.322             | 1.262                           | 1.284                           |
| $d_{\text{O-sub}}$  | \         | 3.373             | 3.246                           | 3.322                           | \                              | 2.672             | 2.674                           | 2.722                           |

**Table S5.**  $U_{Dc}$ ,  $U_0$ ,  $U_c$ ,  $\eta_{ORR}$ ,  $\eta_{OER}$ , and  $\eta_{TOT}$  (in V) for  $W_{n+1}C_n$  and  $W_{n+1}C_nO_2$ .

| Materials   | $U_{Dc}$ | $U_0$ | $U_c$ | $\eta_{ORR}$ | $\eta_{OER}$ | $\eta_{TOT}$ |
|-------------|----------|-------|-------|--------------|--------------|--------------|
| $W_2C$      | 3.67     | 4.70  | 6.44  | 1.04         | 1.74         | 2.77         |
| $W_3C_2$    | 3.52     | 4.12  | 5.05  | 0.60         | 0.93         | 1.53         |
| $W_4C_3$    | 3.18     | 3.69  | 4.47  | 0.51         | 0.78         | 1.29         |
| $W_2CO_2$ , | 3.12     | 3.60  | 4.14  | 0.48         | 0.54         | 1.02         |
| $W_3C_2O_2$ | 2.96     | 3.36  | 3.81  | 0.39         | 0.45         | 0.84         |
| $W_4C_3O_2$ | 2.83     | 3.08  | 3.46  | 0.25         | 0.38         | 0.63         |
